# Supplementary material for: Shape dependent catalytic activity of nanoflowers and nanospheres of Pd4S generated via one pot synthesis and grafted on graphene oxide for Suzuki coupling
Source: Royal Society of Chemistry journal article supplement (doi:10.1039/c4dt01396d), 2014-06-04
Supplement: c4dt01396d1.pdf [file c4dt01396d1.pdf]

Electronic Supporting Information  
For

**Shape dependent catalytic activity of nanoflowers and nanospheres of Pd<sub>4</sub>S generated via one pot synthesis and grafted on graphene oxide for Suzuki coupling**

Ved Vati Singh, Umesh Kumar, Sandeep Nath Tripathi, and Ajai Kumar Singh\*

Department of Chemistry, Indian Institute of Technology Delhi, New Delhi-110016, India

Email: [aksingh@chemistry.iitd.ac.in](mailto:aksingh@chemistry.iitd.ac.in)

**S1 Three-phase Test**

For immobilization of 4-bromobenzoic acid on silica gel following standard procedure<sup>1-3</sup> was used (Scheme S1).

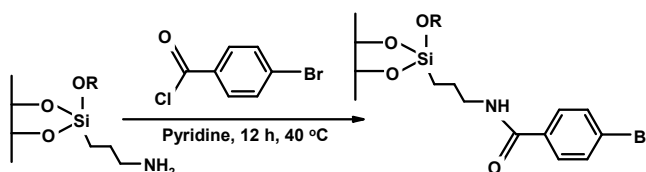

**Scheme S1.** Immobilization of 4-bromobenzoic acid on silica

4-Bromobenzoic acid (1.99 g, 10 mmol) was mixed with dry SOCl<sub>2</sub> (20 mL) and the mixture refluxed for 3 h. It was cooled and thionyl chloride distilled off to give 4-bromobenzoyl chloride as a white solid. 3-Aminopropyl trimethoxysilane-modified silica (1 g), pyridine (0.4 mL), dry THF (10 mL) and 4-bromobenzoyl chloride (1.150 g, 5.25 mmol) were stirred at 40 °C for 12 h in a round bottom flask under N<sub>2</sub> atmosphere. The suspension was filtered through G-4 crucible and washed with 5% HCl (v/v) (3 × 20 mL) followed by 0.02 M solution of K<sub>2</sub>CO<sub>3</sub> in water (2 × 20 mL) and rinsed with distilled water (40 mL) and ethanol (40 mL). The resulting solid was washed with dichloromethane and dried at room temperature in air, resulting in white powder.

**Table S1.** Selected bond lengths [ $\text{\AA}$ ] and bond angles [ $^\circ$ ]

| Compounds | Bond length [ $\text{\AA}$ ] | Bond angle [ $^\circ$ ] |             |            |
|-----------|------------------------------|-------------------------|-------------|------------|
| <b>1</b>  | Pd1—S1                       | 2.270(7)                | N1—Pd1—S1   | 97.4(6)    |
|           | Pd1—N1                       | 2.047(2)                | S1—Pd1—Cl2  | 83.7(3)    |
|           | Pd1—Cl1                      | 2.337(7)                | Cl2—Pd1—Cl1 | 92.7(3)    |
|           | Pd1—Cl2                      | 2.304(7)                | Cl1—Pd1—N1  | 86.4(1)    |
|           |                              |                         | N1—Pd1—Cl2  | 176.91(6)  |
|           |                              |                         | N1—Pd1—Cl1  | 86.36(6)   |
|           |                              |                         | S1—Pd1—Cl1  | 175.58(2)  |
|           |                              |                         | C6—S1—C7    | 103.13(13) |
|           |                              |                         | C6—S1—Pd1   | 105.67(8)  |
|           |                              |                         | C6—S1—C7    | 103.13(13) |
|           |                              |                         | C7—S1—Pd1   | 111.59(10) |

**Table S2.** Crystallographic data and structure refinement summary for **1**.

| <b>1</b>                                                                                           |                                                     |
|----------------------------------------------------------------------------------------------------|-----------------------------------------------------|
| Formula                                                                                            | C <sub>9</sub> H <sub>13</sub> Cl <sub>2</sub> NPdS |
| Formula weight                                                                                     | 344.57                                              |
| <i>T</i> /K                                                                                        | 298(2)                                              |
| $\lambda$ /Å                                                                                       | 0.71073                                             |
| Cryst system                                                                                       | monoclinic                                          |
| Space group                                                                                        | <i>P21/c</i>                                        |
| <i>a</i> /Å                                                                                        | 10.6716(18)                                         |
| <i>b</i> /Å                                                                                        | 13.846(2)                                           |
| <i>c</i> /Å                                                                                        | 8.2794(14)                                          |
| $\alpha$ /deg                                                                                      | 90.00                                               |
| $\beta$ /deg                                                                                       | 108.956(3)                                          |
| $\gamma$ /deg                                                                                      | 90.00                                               |
| Vol/Å <sup>3</sup>                                                                                 | 1157.0(3)                                           |
| <i>Z</i>                                                                                           | 4                                                   |
| <i>D</i> <sub>calcd</sub> / g.cm <sup>-3</sup>                                                     | 1.978                                               |
| <i>F</i> (000)                                                                                     | 680                                                 |
| $\theta$ range/deg                                                                                 | 2.02–25.00                                          |
| Reflections measured                                                                               | 2040                                                |
| Reflections used                                                                                   | 1958                                                |
| parameters                                                                                         | 127                                                 |
| $\mu$ (Mo K $\alpha$ ) (cm <sup>-1</sup> )                                                         | 2.205                                               |
| <i>R</i> <sub>1</sub> , w <i>R</i> <sub>2</sub> [ <i>I</i> > 2 $\sigma$ ( <i>I</i> )] <sup>a</sup> | 0.0198, 0.0207                                      |
| <i>R</i> <sub>1</sub> , w <i>R</i> <sub>2</sub> (all data) <sup>b</sup>                            | 0.0486, 0.0490                                      |
| GOF <sup>c</sup>                                                                                   | 1.060                                               |

$${}^a R_1 = \frac{\sum ||F_o| - |F_c||}{\sum |F_o|}; \quad {}^b wR_2 = \left\{ \frac{\sum [w(F_o^2 - F_c^2)^2]}{\sum [w(F_o^2)^2]} \right\}^{1/2}; \quad {}^c S = \left\{ \frac{\sum [w(F_o^2 - F_c^2)^2]}{(n-p)^2} \right\}^{1/2}$$

**Table S3.** Selected hydrogen bond parameters of **1** (Inter atomic distances in Å and bond angles in deg).

| D–H···A      | D–H  | H···A | D···A | D–H···A |
|--------------|------|-------|-------|---------|
| N1–H1A···Cl2 | 0.90 | 2.70  | 3.14  | 136     |
| C8–H8B···Cl2 | 0.97 | 2.95  | 3.69  | 134.    |
| N1–H1A···Cl2 | 0.90 | 2.56  | 3.34  | 146     |

## S2. Powder XRD of Pd<sub>4</sub>S, GO and GO-Pd<sub>4</sub>S nanocomposites (nanoflowers and nanospheres)

The powder X-ray diffraction pattern of Pd<sub>4</sub>S nanoparticles (Fig. S1) was indexed<sup>4</sup> on the basis of a primitive tetragonal unit cell (JCPDS #73–1387) with the refined lattice parameter = 10.87 Å and d values (*hkl*): 3.77 (101), 3.61 (110), 2.79 (002), 2.55 (200), 2.45 (102), 2.32 (201), 2.28 (210), 2.21 (112), 2.11 (211), 1.88 (202), 1.77 (212), 1.75 (103), 1.63 (301), 1.61 (310), 1.55 (311), 1.51 (222), 1.50 (203), 1.45 (302), 1.44 (213), 1.41 (320), 1.39 (312), 1.37 (321). PXRD pattern of graphene oxide<sup>5</sup> was recorded and shown in Fig S2. The powder X-ray diffraction pattern of GO-Pd<sub>4</sub>S nanocomposites are also shown in Fig. S3 and Fig. S4 respectively.

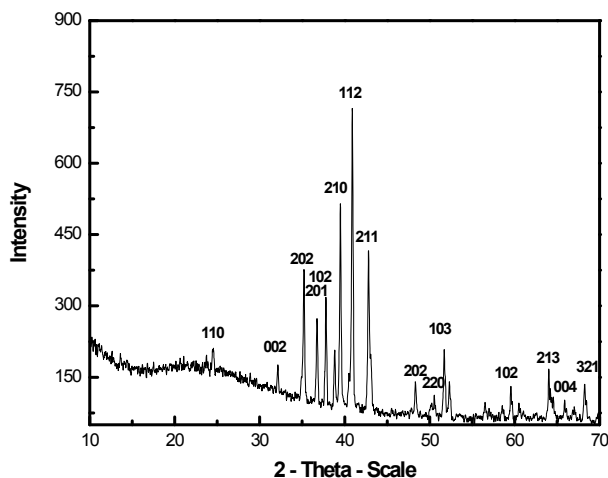

**Fig. S1.** PXRD pattern of Pd<sub>4</sub>S NPs

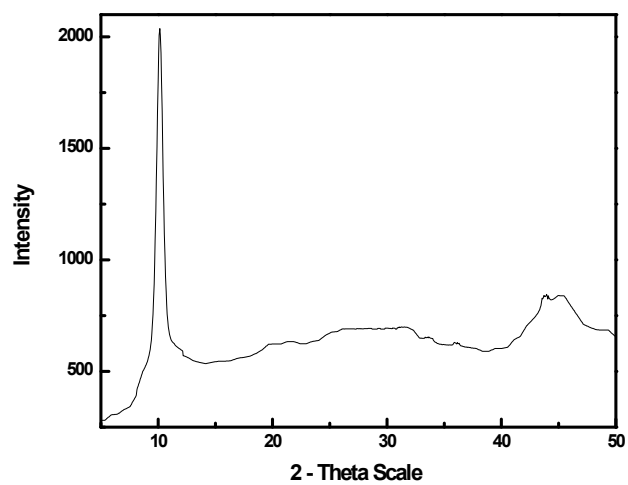

Fig. S2. PXRD pattern of Graphene oxide (GO)

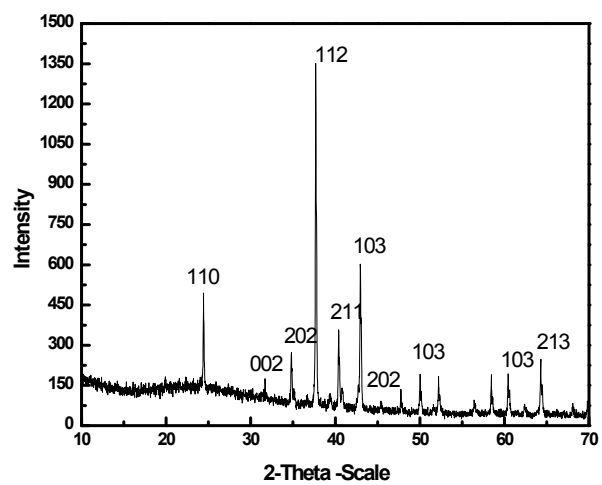

Fig. S3 PXRD pattern of nanoflowers GO-Pd<sub>4</sub>S.

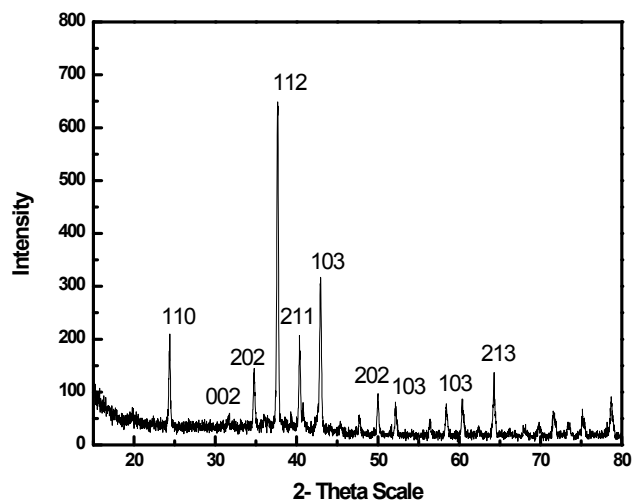

Fig. S4 PXR D pattern of nanospheres GO-Pd<sub>4</sub>S.

### S3. TEM-EDX of Pd<sub>4</sub>S nanocomposites

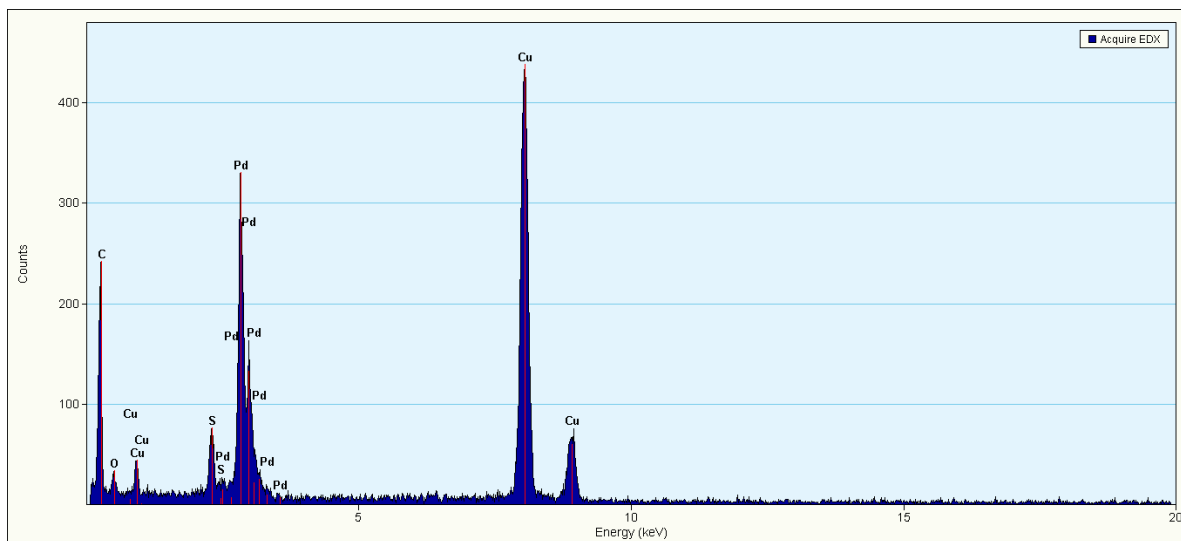

Fig. S5 TEM-EDX of nanoflowers GO-Pd<sub>4</sub>S

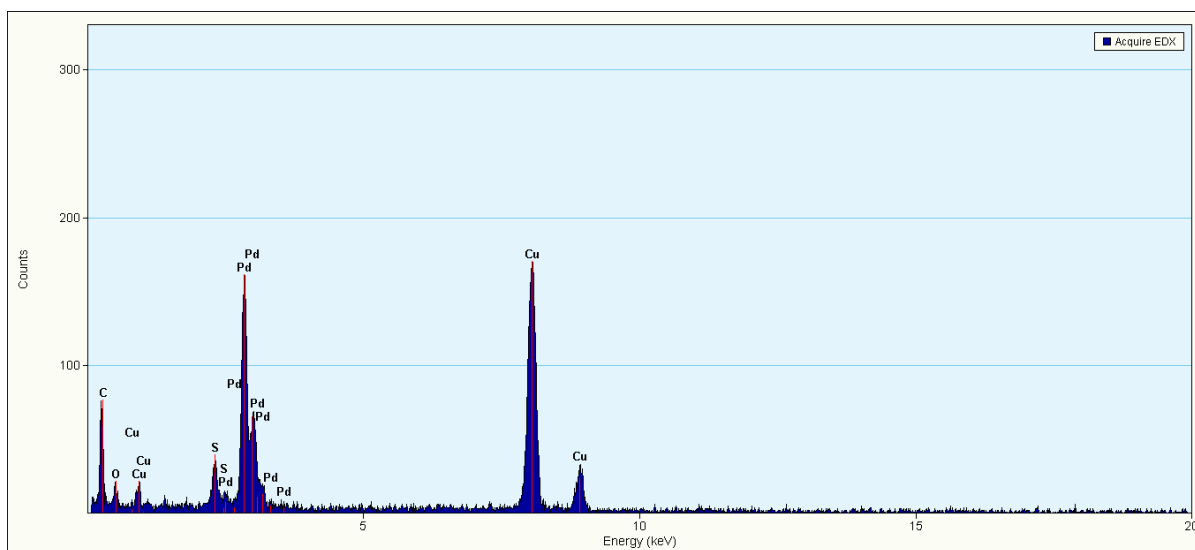

Fig. S6 TEM-EDX of nanospheres GO-Pd<sub>4</sub>S

#### S4. Size distribution of GO-Pd<sub>4</sub>S nanocomposites

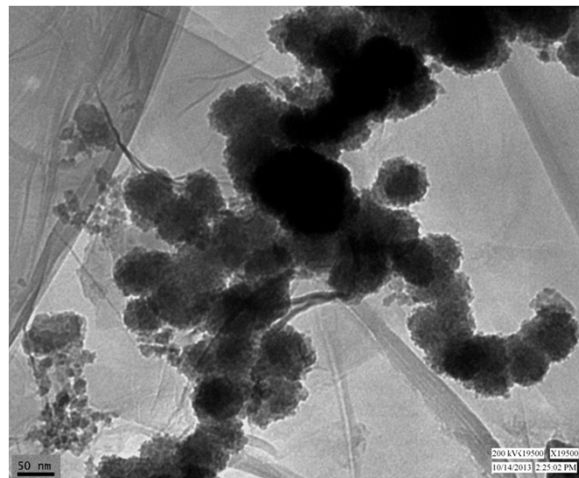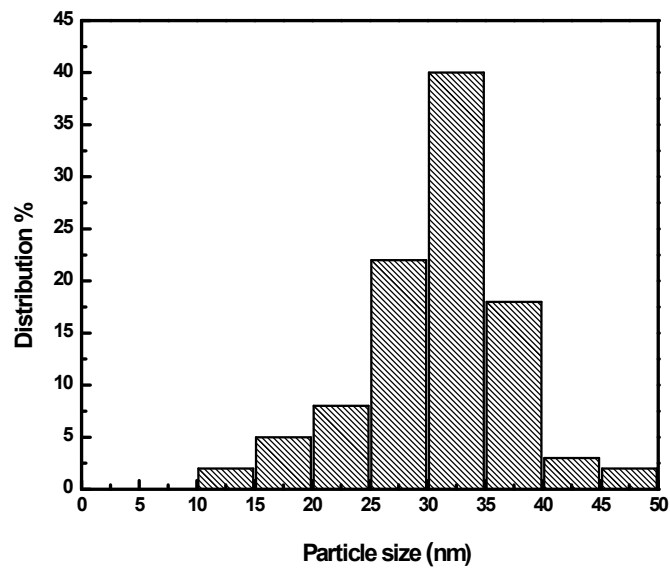

**Fig. S7** TEM image and size distribution of GO-Pd<sub>4</sub>S nanoflowers.



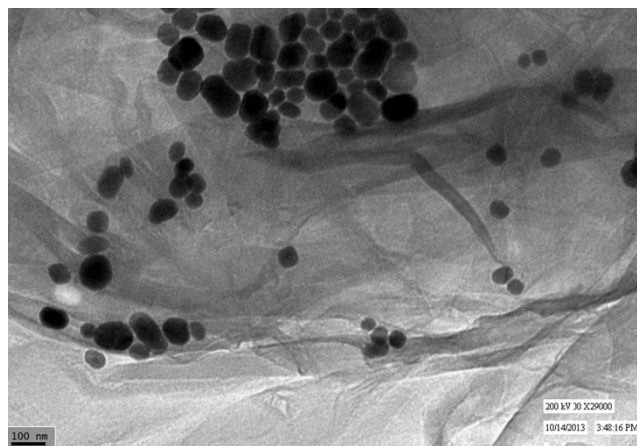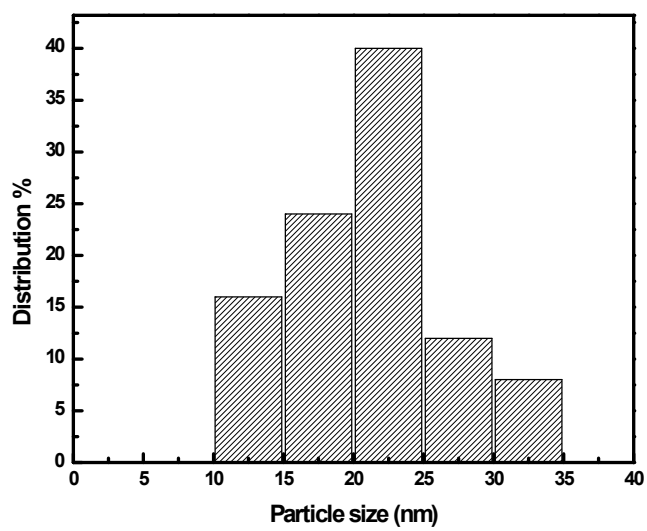

**Fig. S8** TEM image and size distribution of nanospheres GO-Pd<sub>4</sub>S.

## S5. Spectroscopic data of coupled products

### 4-Phenylbenzaldehyde (light yellow solid)

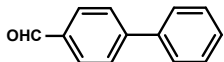

$^1\text{H NMR}$  (300 MHz,  $\text{CDCl}_3$ ):  $\delta$  7.537–7.447 (m, 3H), 7.678–7.616 (m, 2H), 7.822 (d,  $J = 9.0$  Hz, 2H), 7.994 (d,  $J = 5.4$  Hz, 2H), 10.081 (s, 1H).

### 4-Nitrobiphenyl (Pale yellow solid)

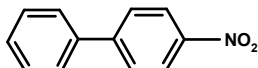

$^1\text{H NMR}$  (300 MHz,  $\text{CDCl}_3$ ):  $\delta$  7.462–7.571 (m, 3H), 7.663 (d,  $J = 8.5$  Hz, 2H), 8.050 (d,  $J = 8.7$  Hz, 2H), 8.225 (d,  $J = 8.7$  Hz, 2H).

### 4-Phenylbenzotrile (pale yellow solid)

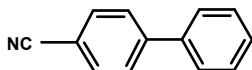

$^1\text{H NMR}$  (300 MHz,  $\text{CDCl}_3$ ):  $\delta$  7.367–7.338 (m, 3H, aromatic), 7.492–7.413 (m, 2H, aromatic), 7.563–7.499 (m, 4H, aromatic).

### 4-Acetylbiphenyl (white solid)

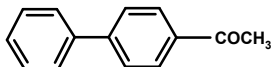

$^1\text{H NMR}$  (300 MHz,  $\text{CDCl}_3$ ):  $\delta$  2.595 (s, 3H), 7.554–7.507 (m, 3H), 7.630–7.601 (m, 4H), 7.844 (d,  $J = 6.6$  Hz, 2H).

### Biphenyl-4-carboxylic acid (White solid)

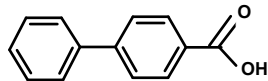

$^1\text{H NMR}$  (300 MHz, DMSO):  $\delta$  7.324–7.423 (m, 3H), 7.769 (d,  $J = 7.0$  Hz, 2H), 7.791 (d,  $J = 8.3$  Hz, 2H), 8.034 (d,  $J = 8.2$  Hz, 2H)

### Biphenyl (white solid)

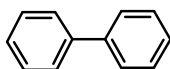

$^1\text{H NMR}$  (300 MHz,  $\text{CDCl}_3$ ):  $\delta$  7.526 (t,  $J = 6.9$  Hz, 2H), 7.596 (t,  $J = 7.2$  Hz, 4H), 7.775 (d,  $J = 7.2$  Hz, 4H).

#### 4-Methylbiphenyl (colorless solid)

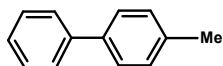

$^1\text{H NMR}$  (300 MHz,  $\text{CDCl}_3$ ):  $\delta$  2.377 (s, 3H), 7.213 (d,  $J = 8.4$  Hz, 2H), 7.284–7.213 (m, 1H), 7.406–7.390 (m, 2H), 7.414 (d,  $J = 8.7$  Hz, 2H), 7.538–7.443 (m, 2H).

#### S6. References

1. J. Rebek, F. Gavina, *J. Am. Chem. Soc.* 1974, **96**, 7112.
2. J. Rebek, D. Brown, S. Zimmerman, *J. Am. Chem. Soc.* 1975, **97**, 454.
3. I. W. Davies, L. Matty, D.L. Hughes, P.J. Reider, *J. Am. Chem. Soc.*, 2001, **123**, 10139.
4. Powder Diffraction Files Nos. 73-1424, JCPDS-ICDD, International Centre for Diffraction Data, Swarthmore, PA, 1990.
5. S. Park, J. An, I. Jung, R.D. Piner, S.J. An, X.Li, A. Velamakanni, R.S. Ruoff, *Nano Lett*, 2009, **9**, 1593.

## S 7. NMR Spectra

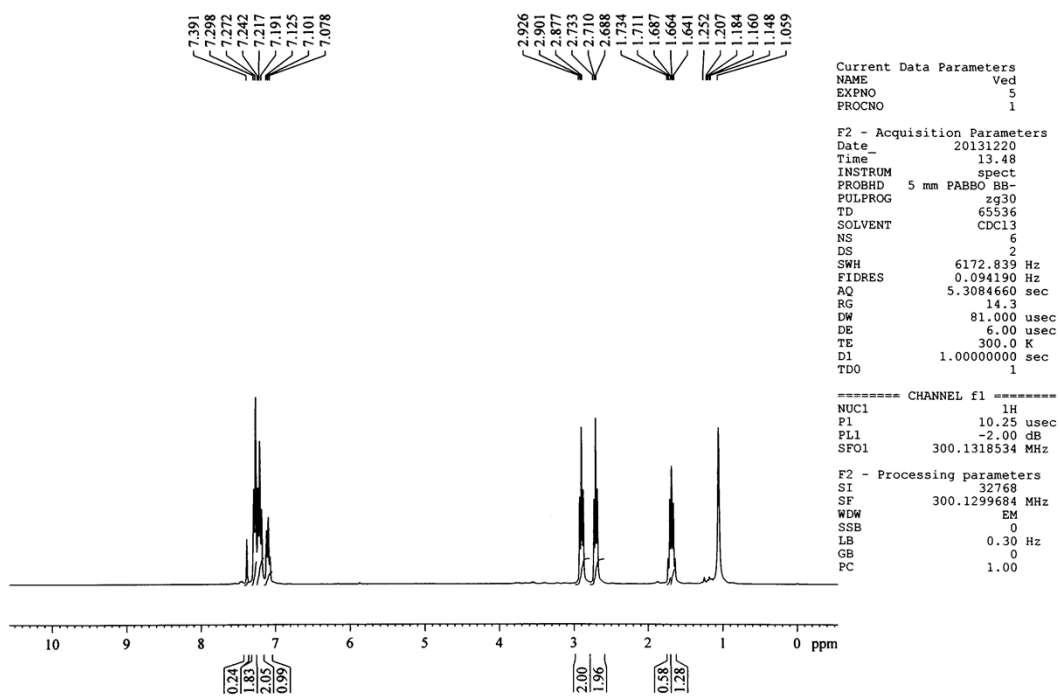

Fig. S9  $^1\text{H}$  NMR of Ligand (L)

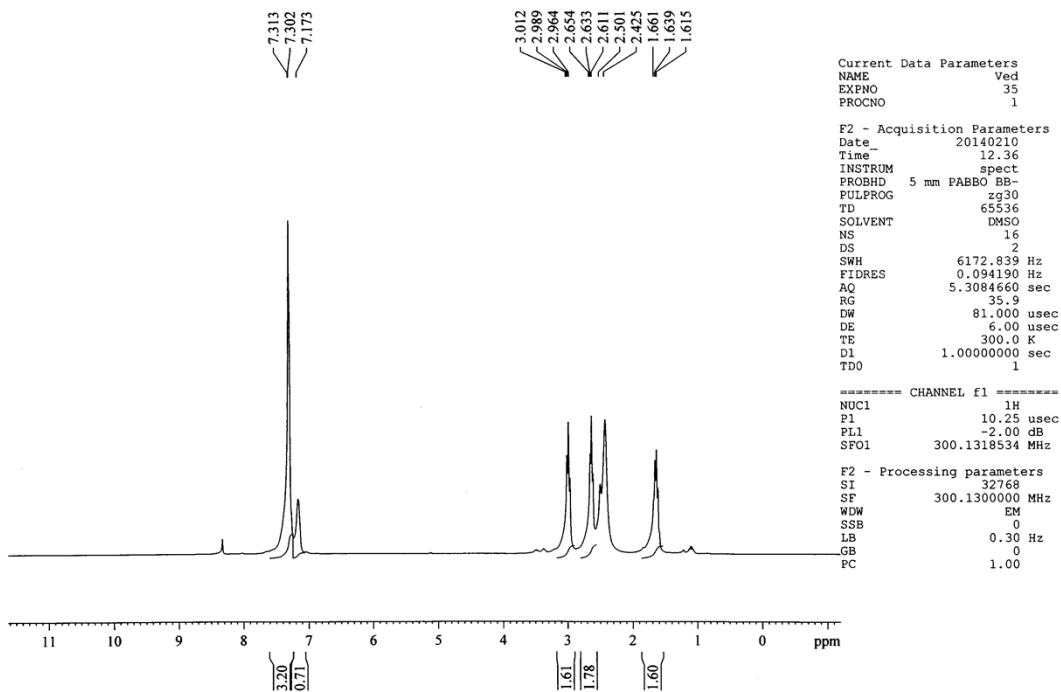

Figure S10 <sup>1</sup>H NMR of Complex (1)

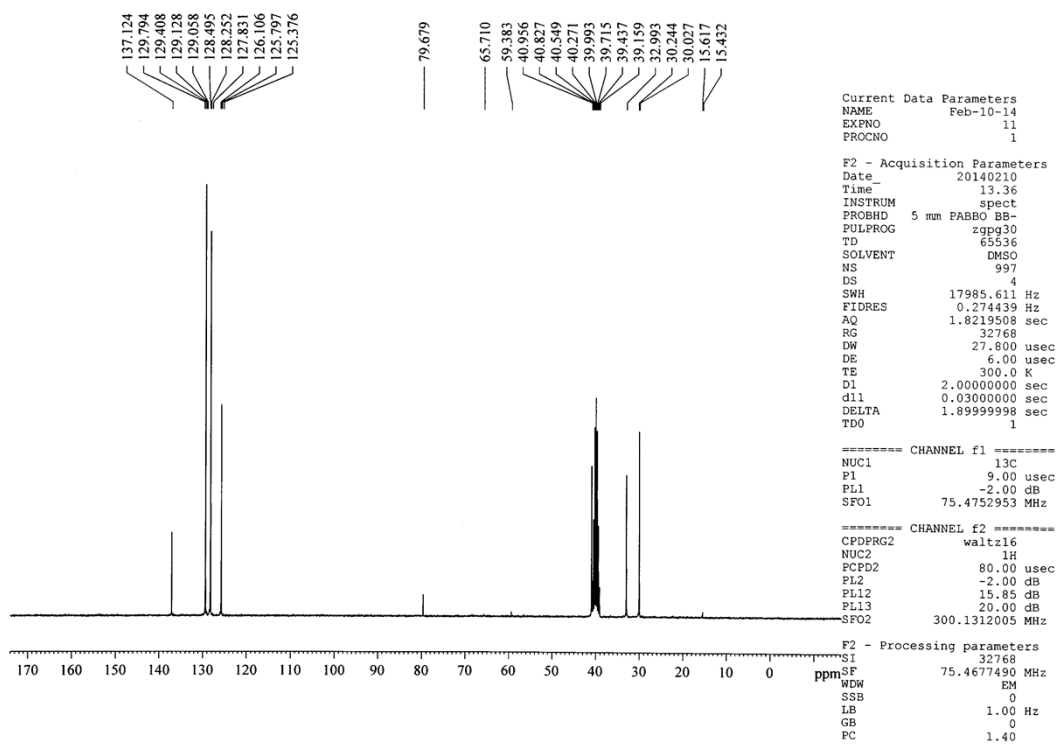

Fig. S11  $^{13}\text{C}\{^1\text{H}\}$  NMR of Complex 1
